# Supplementary material
Source: publisher site journal article supplement (https://www.dovepress.com/article/493302)
Supplement: Supplementary file 1 [file get_supplementary_file.php]

**Supplementary**

Supplementary Figure 1. The feature selection in LASSO of each model.

Rad_SAG


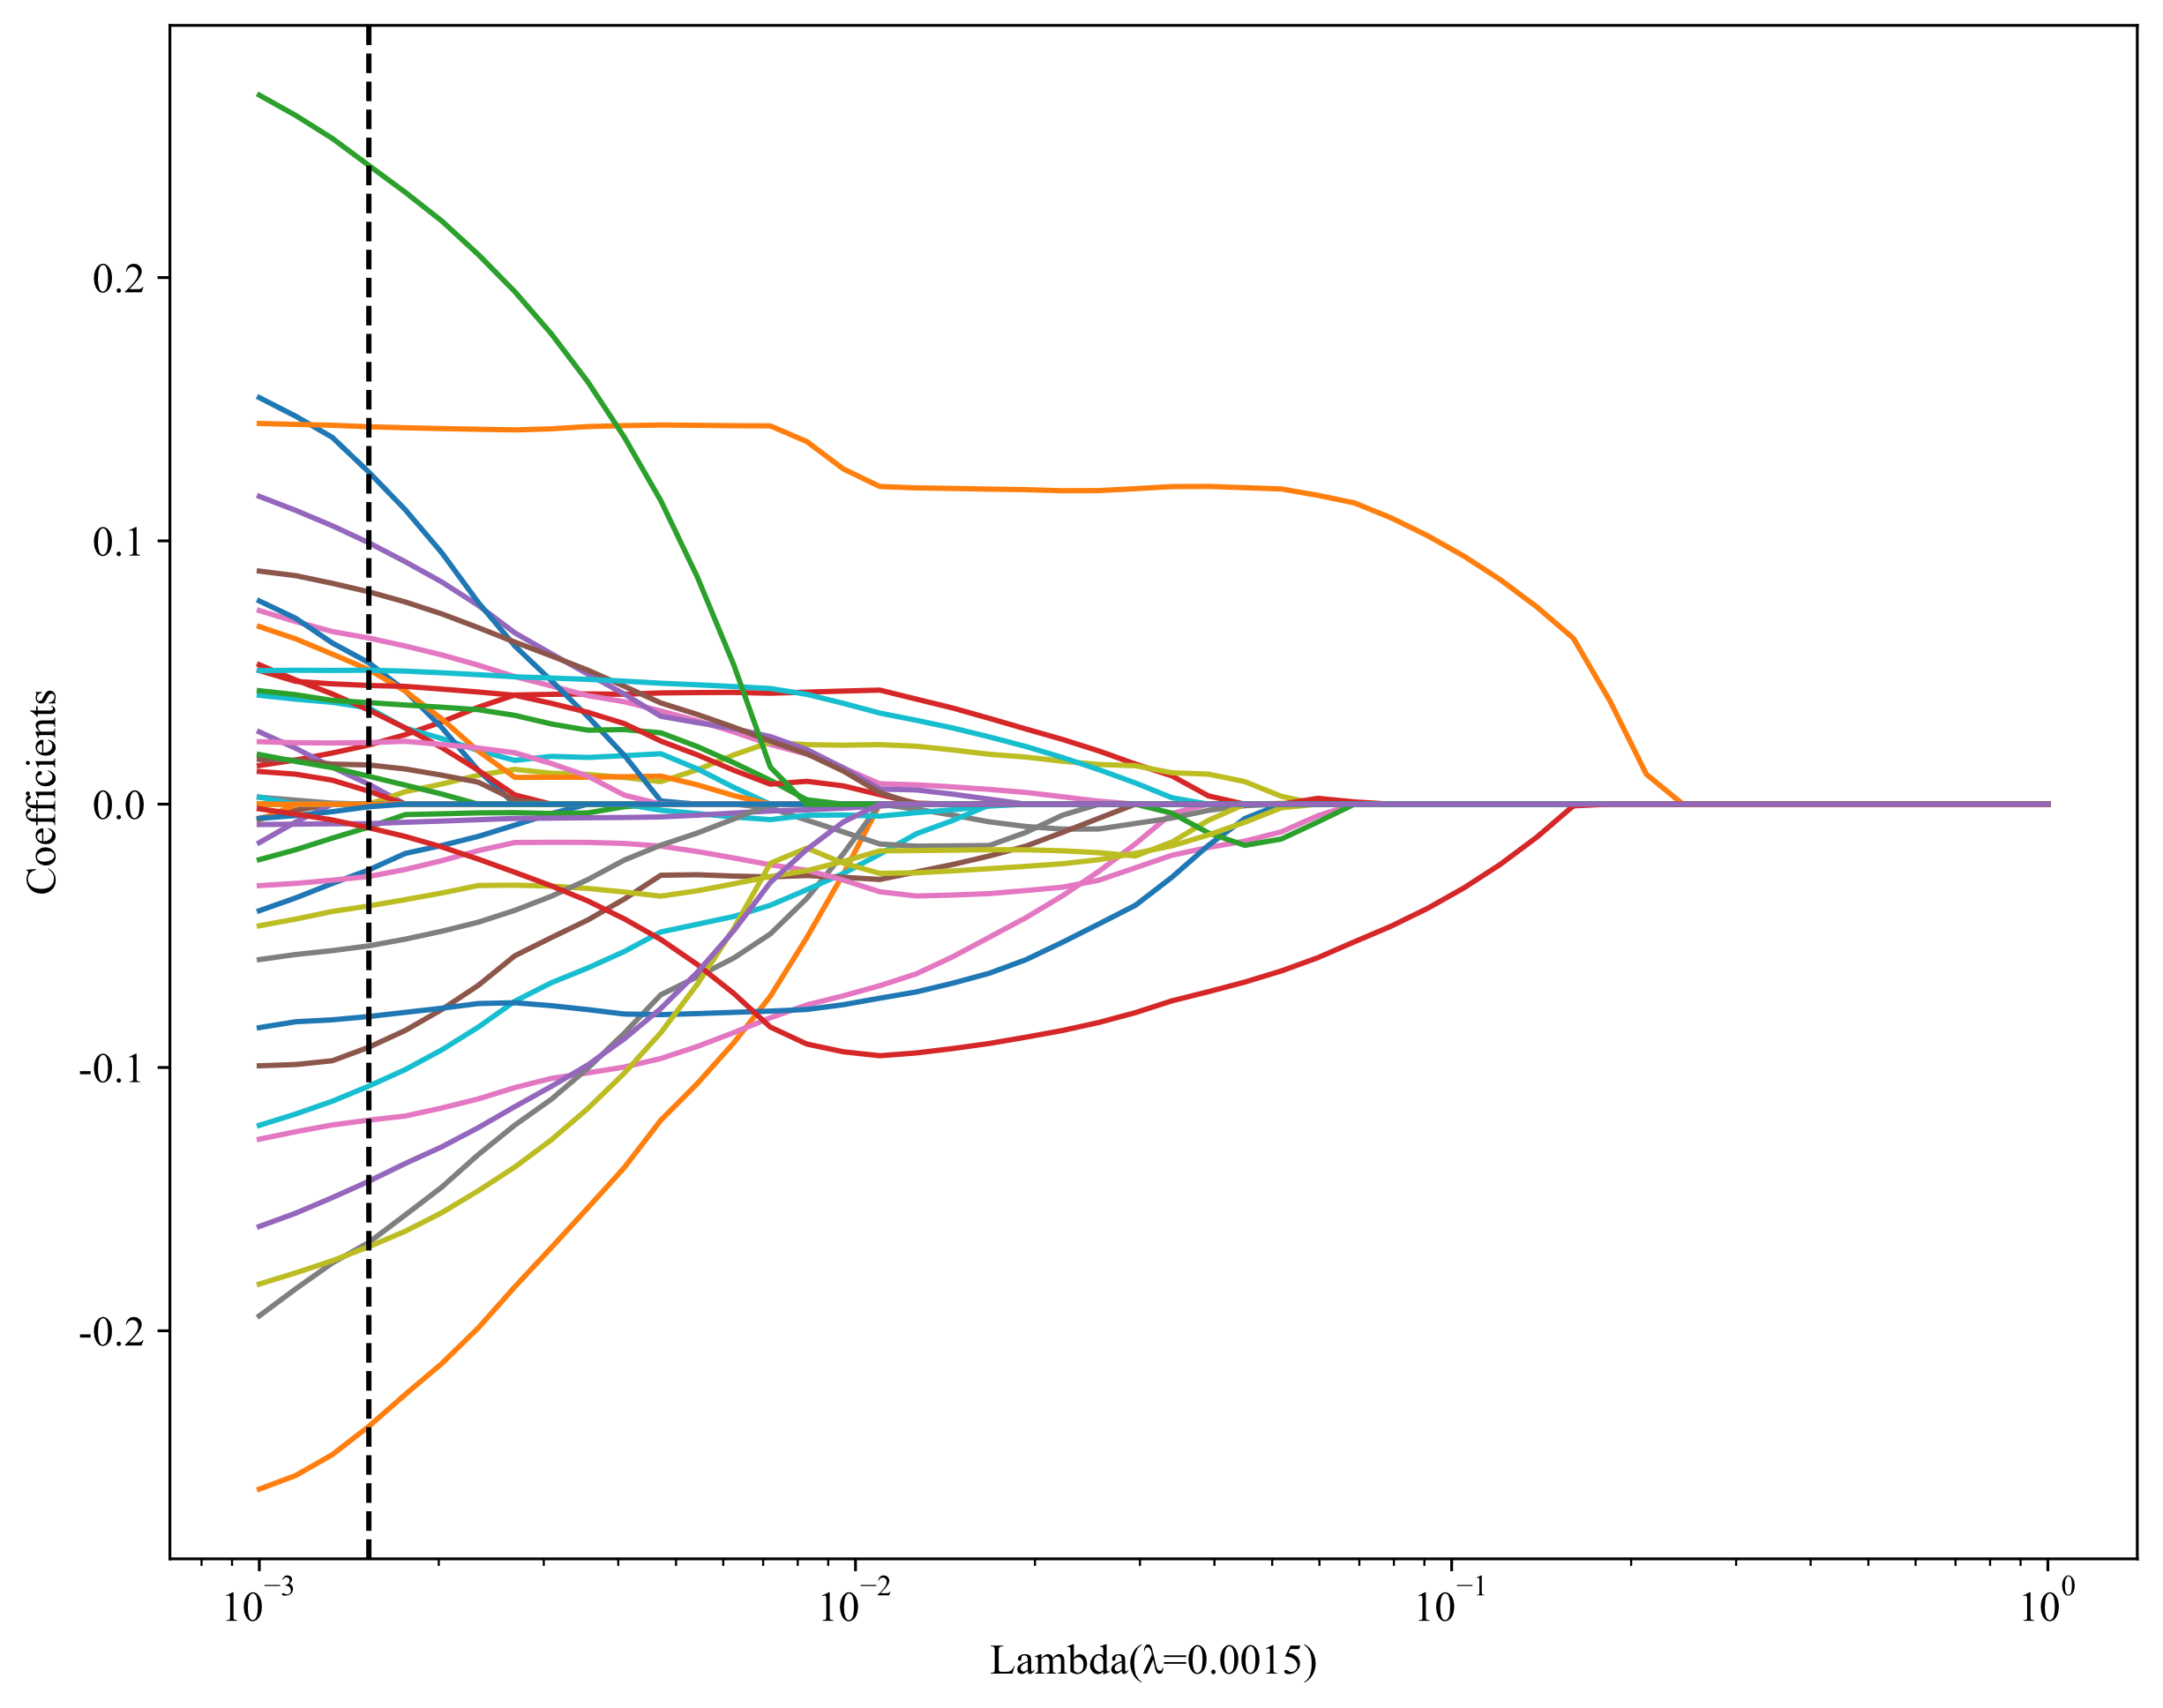

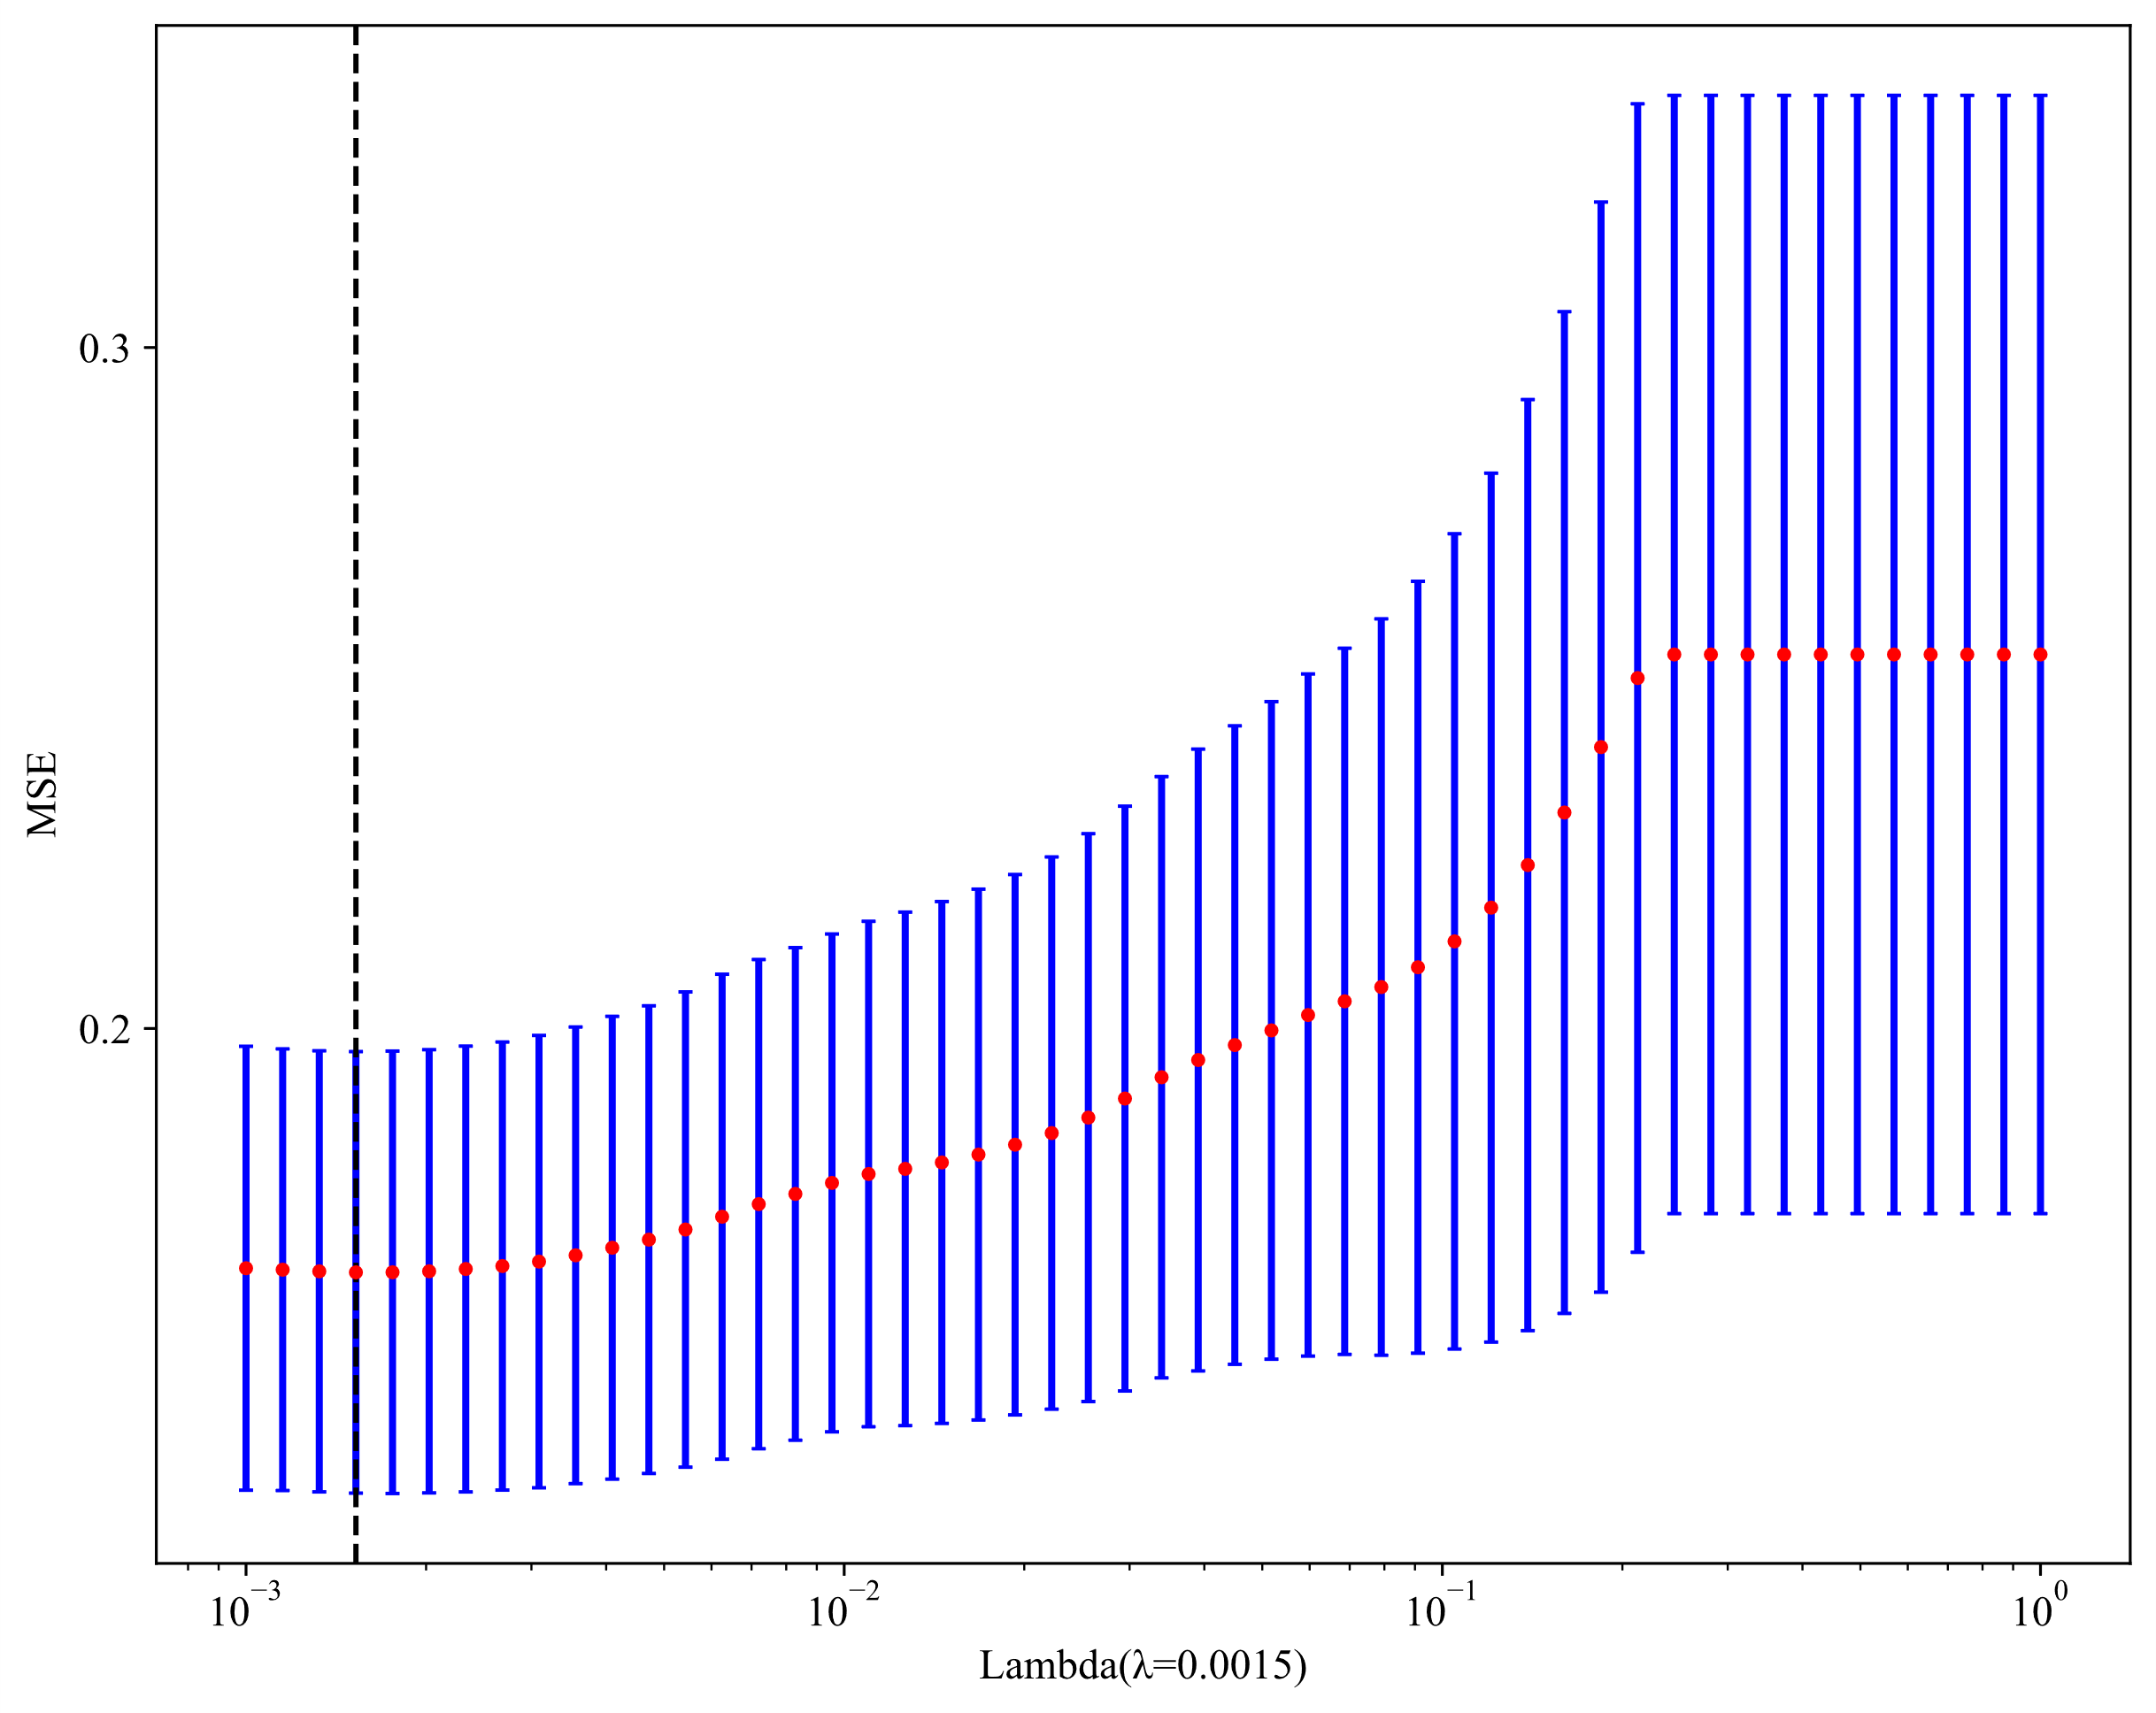


Rad_AXI


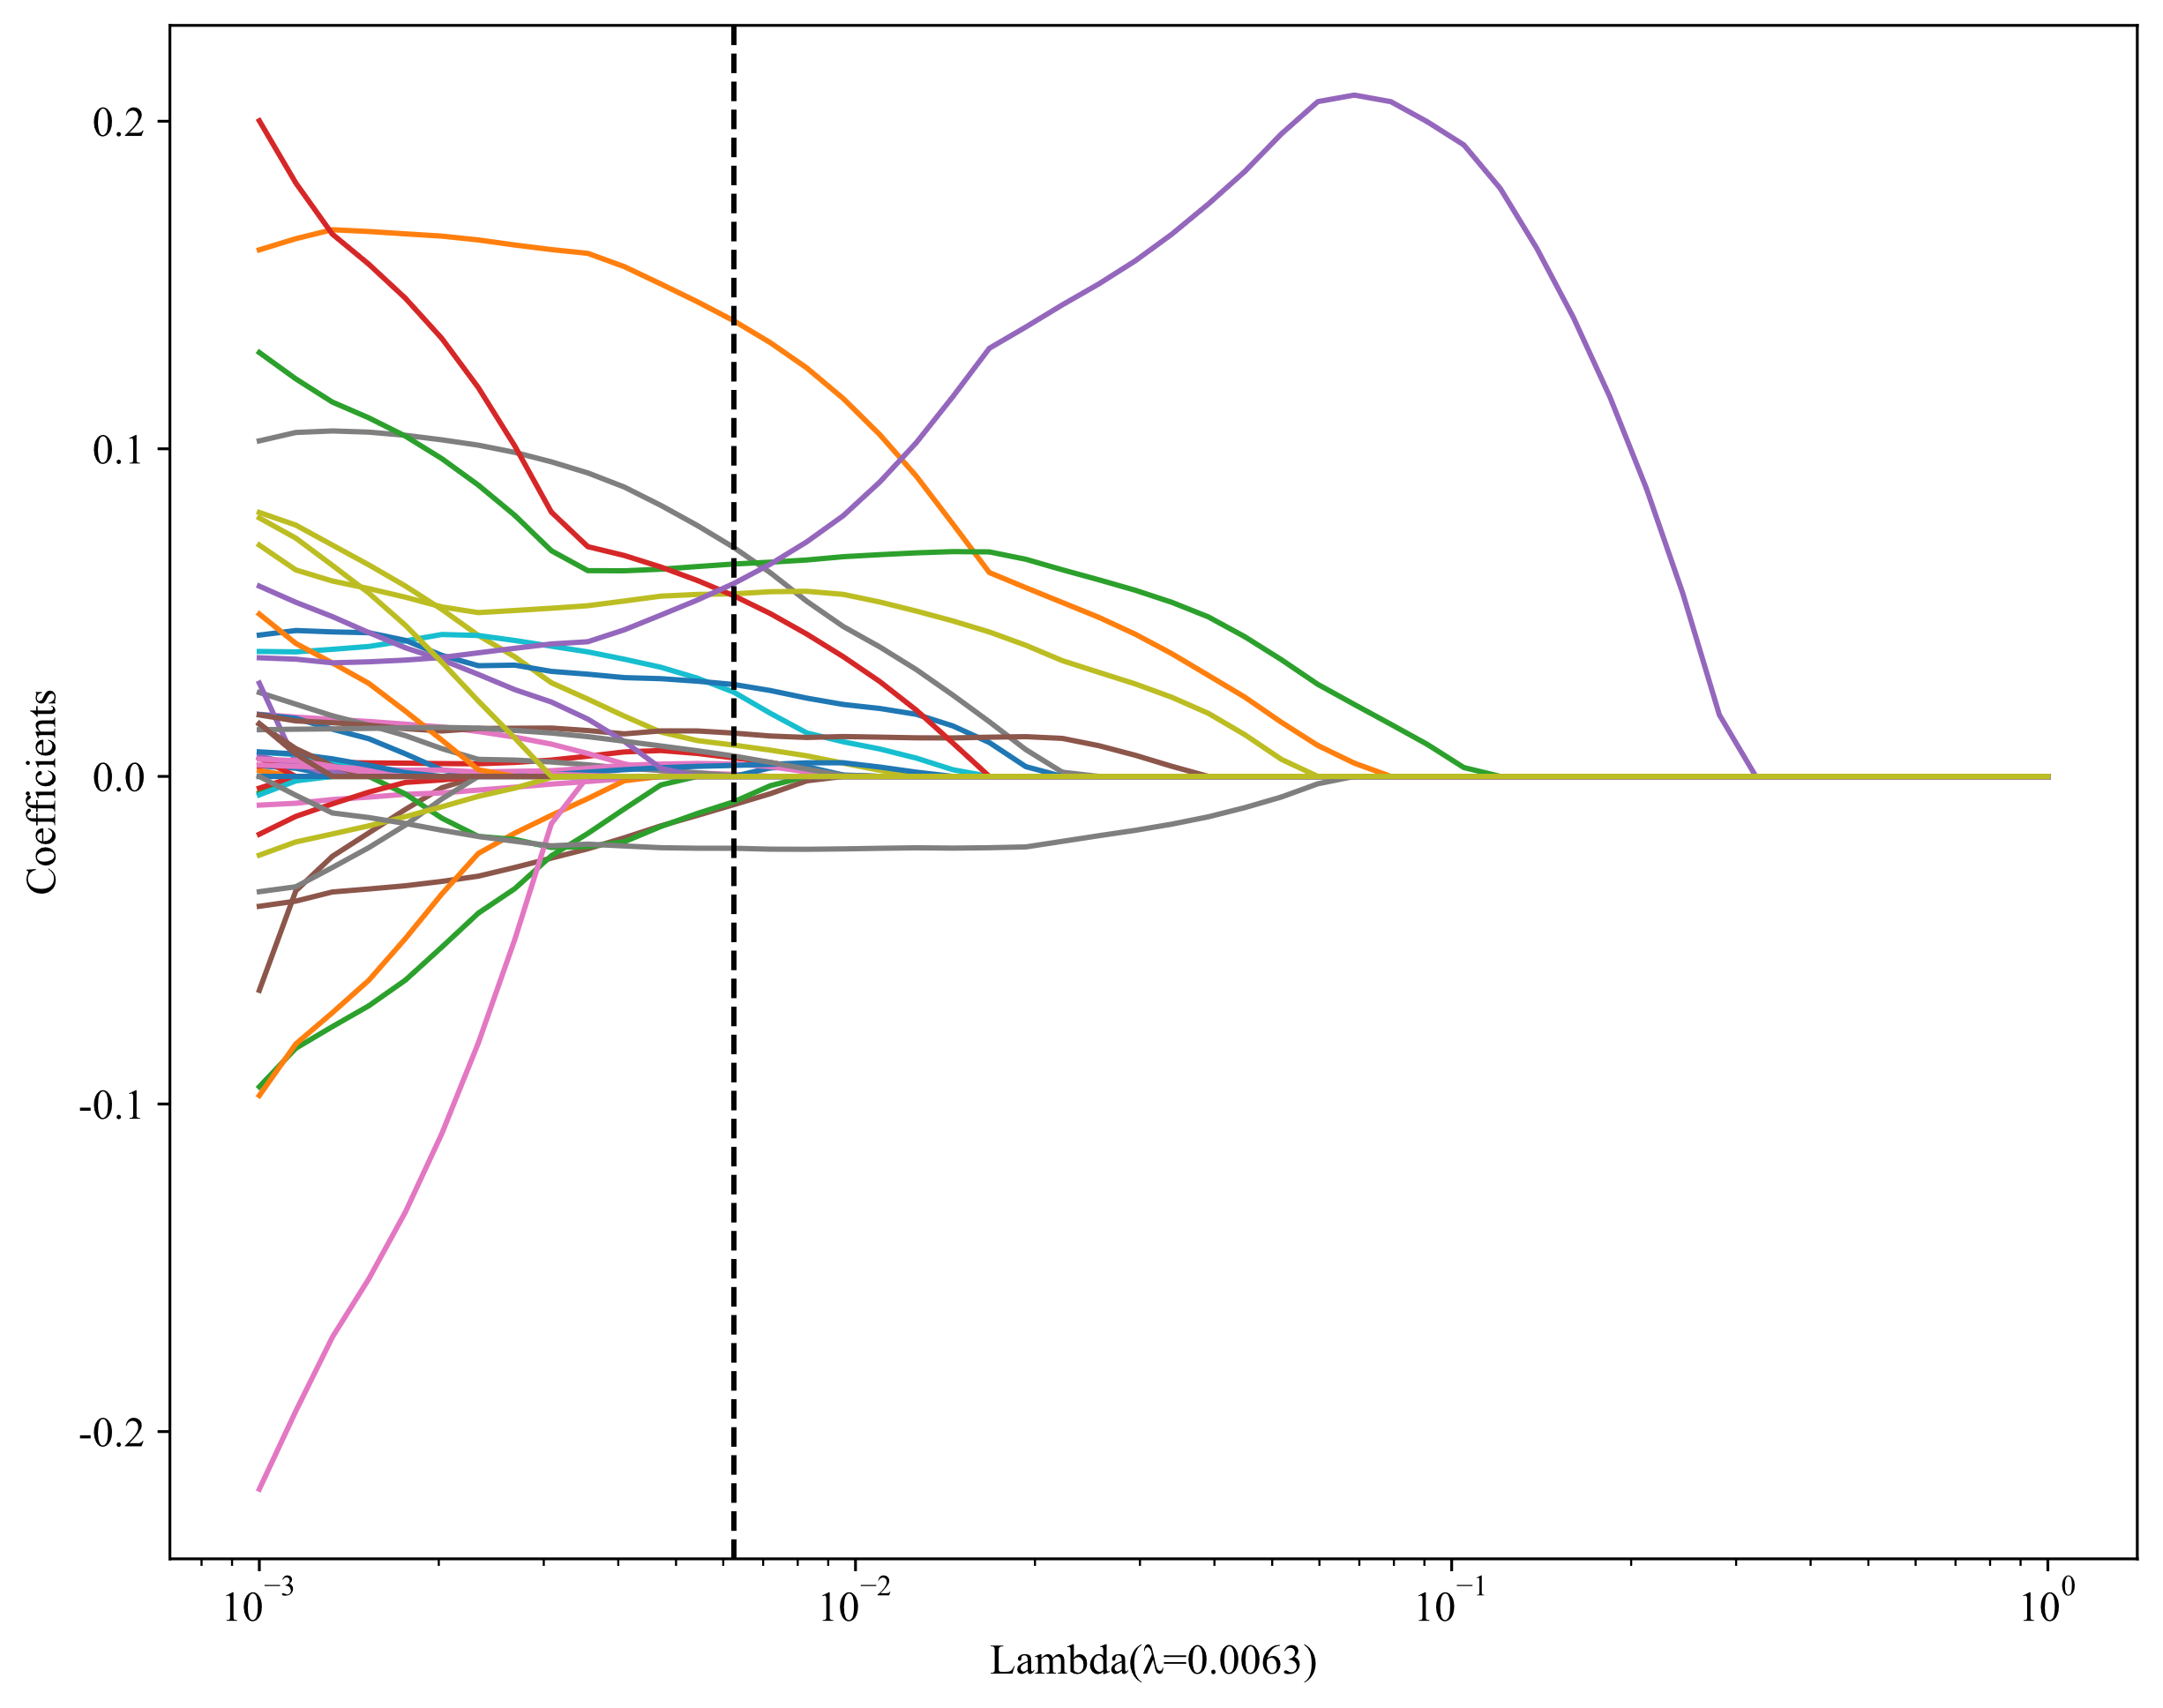

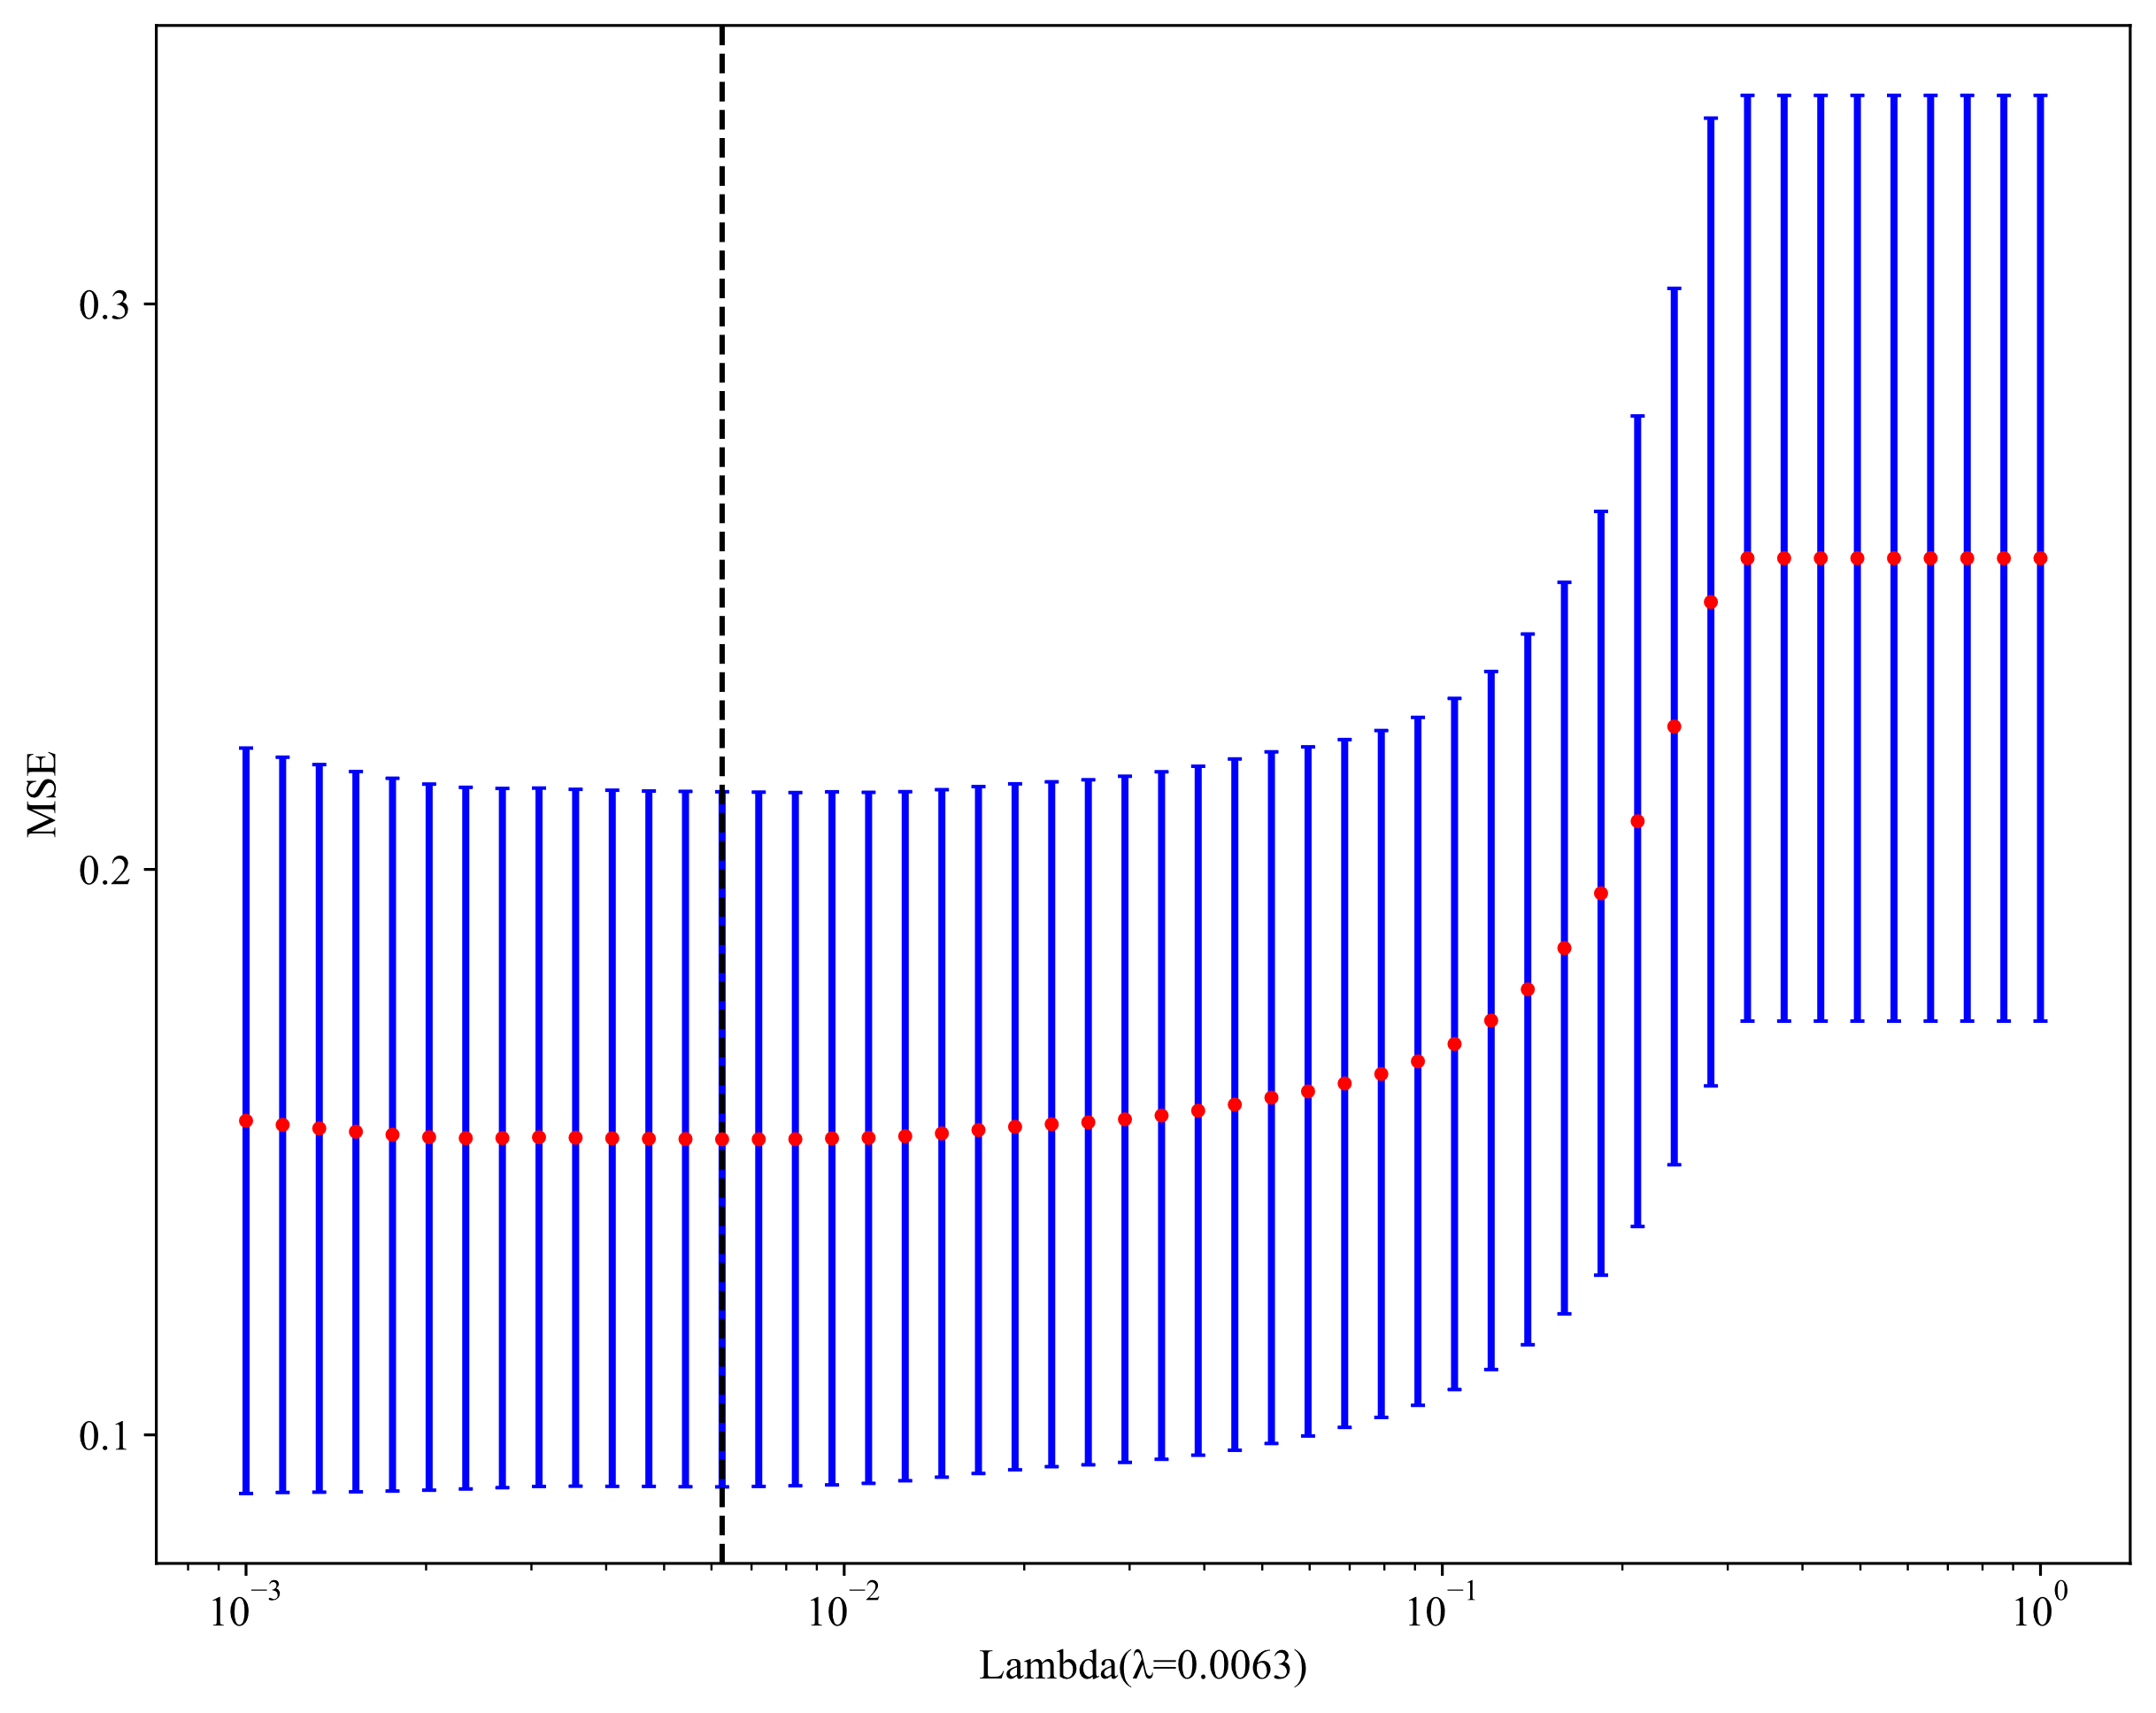


DL_SAG


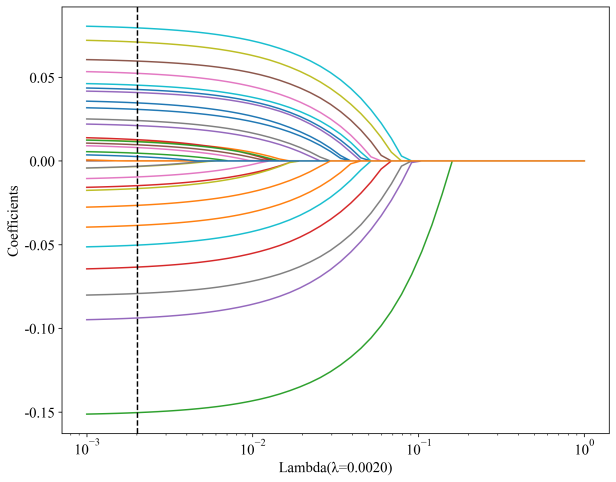

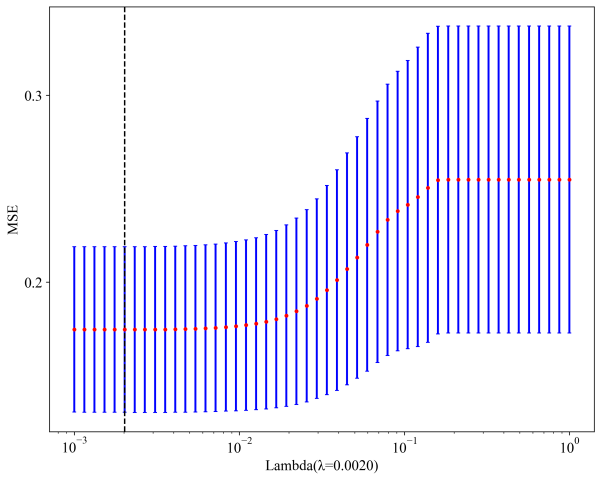


DL_AXI


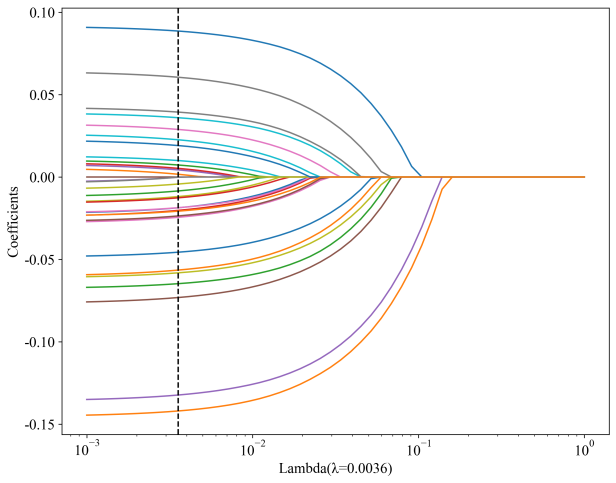

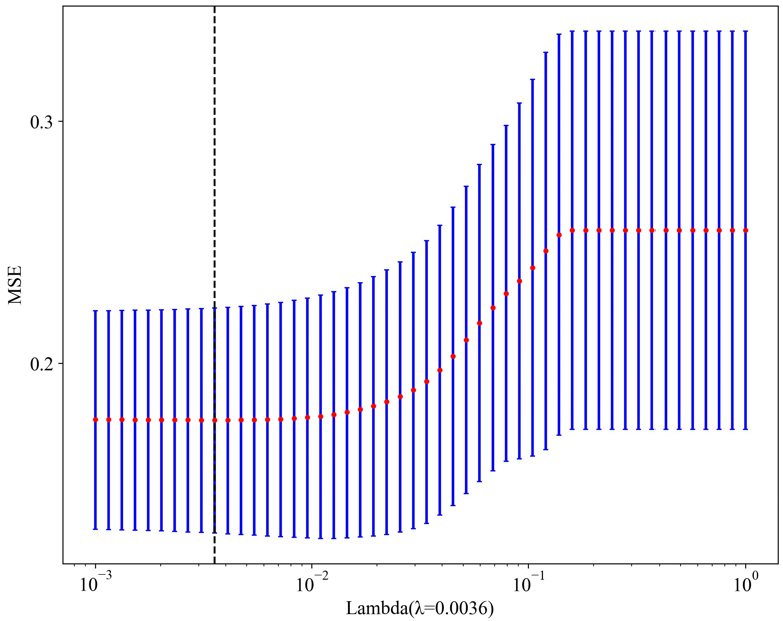


DLR


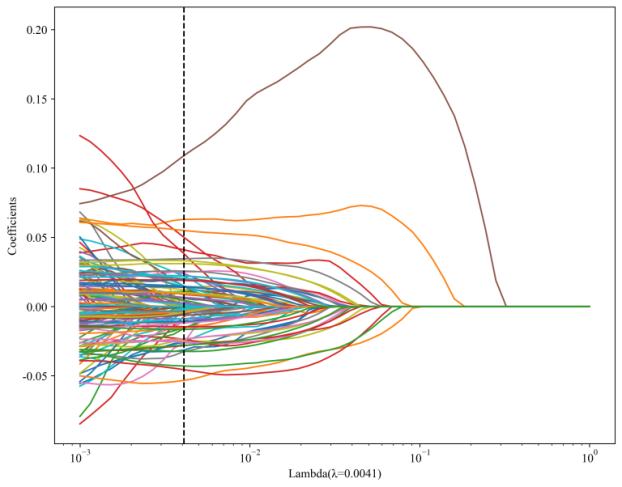

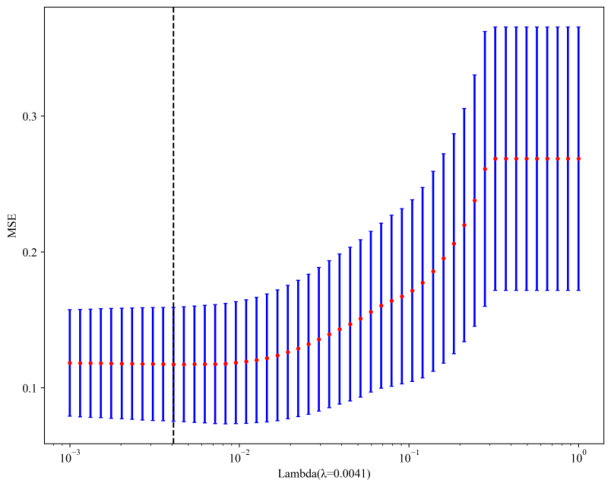


Nomogram


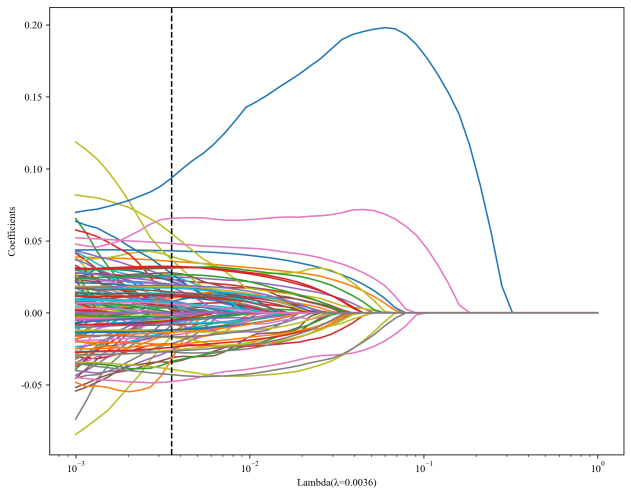

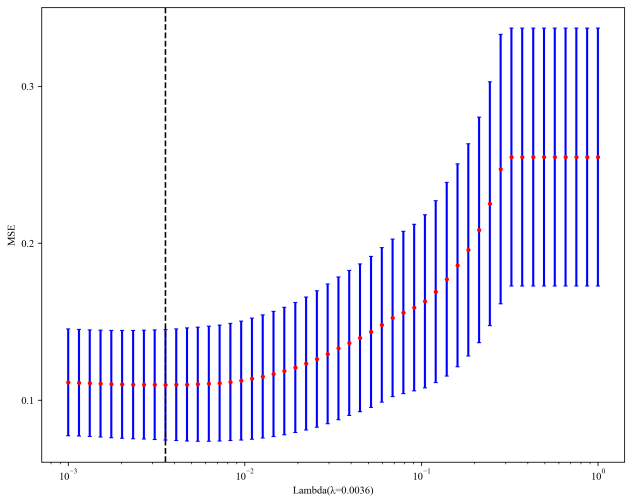


Supplementary Figure 2. Histograms of the rad scores based on the selected features of each model

Rad_SAG


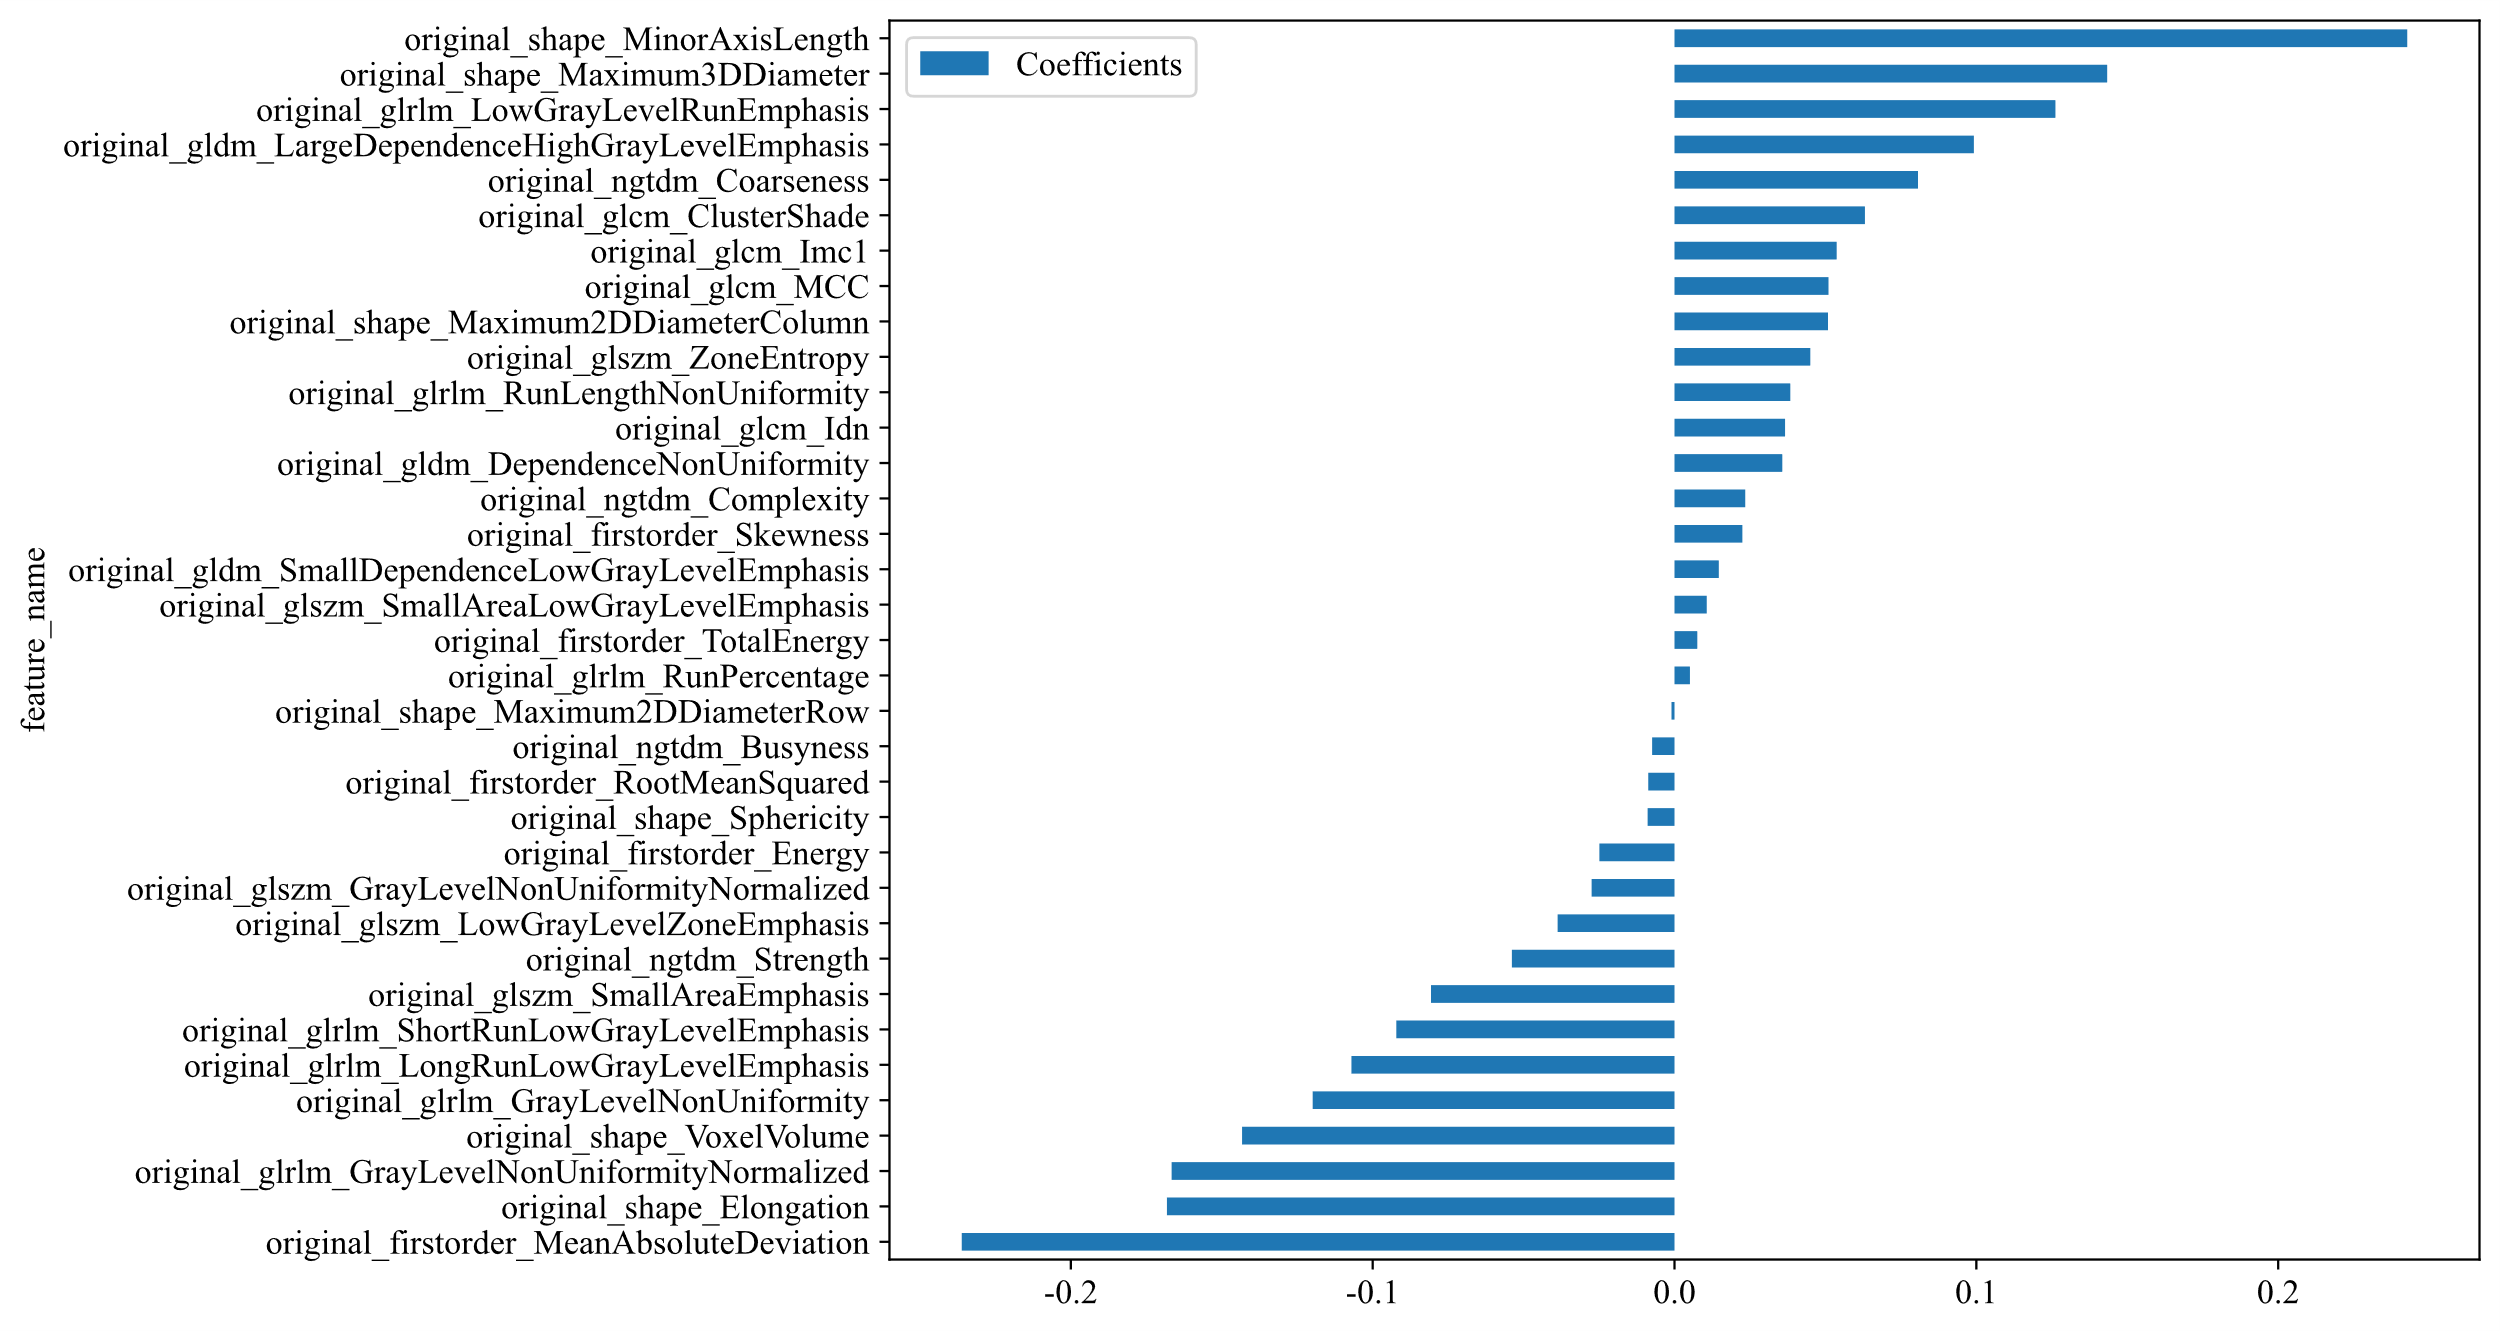


Rad_AXI


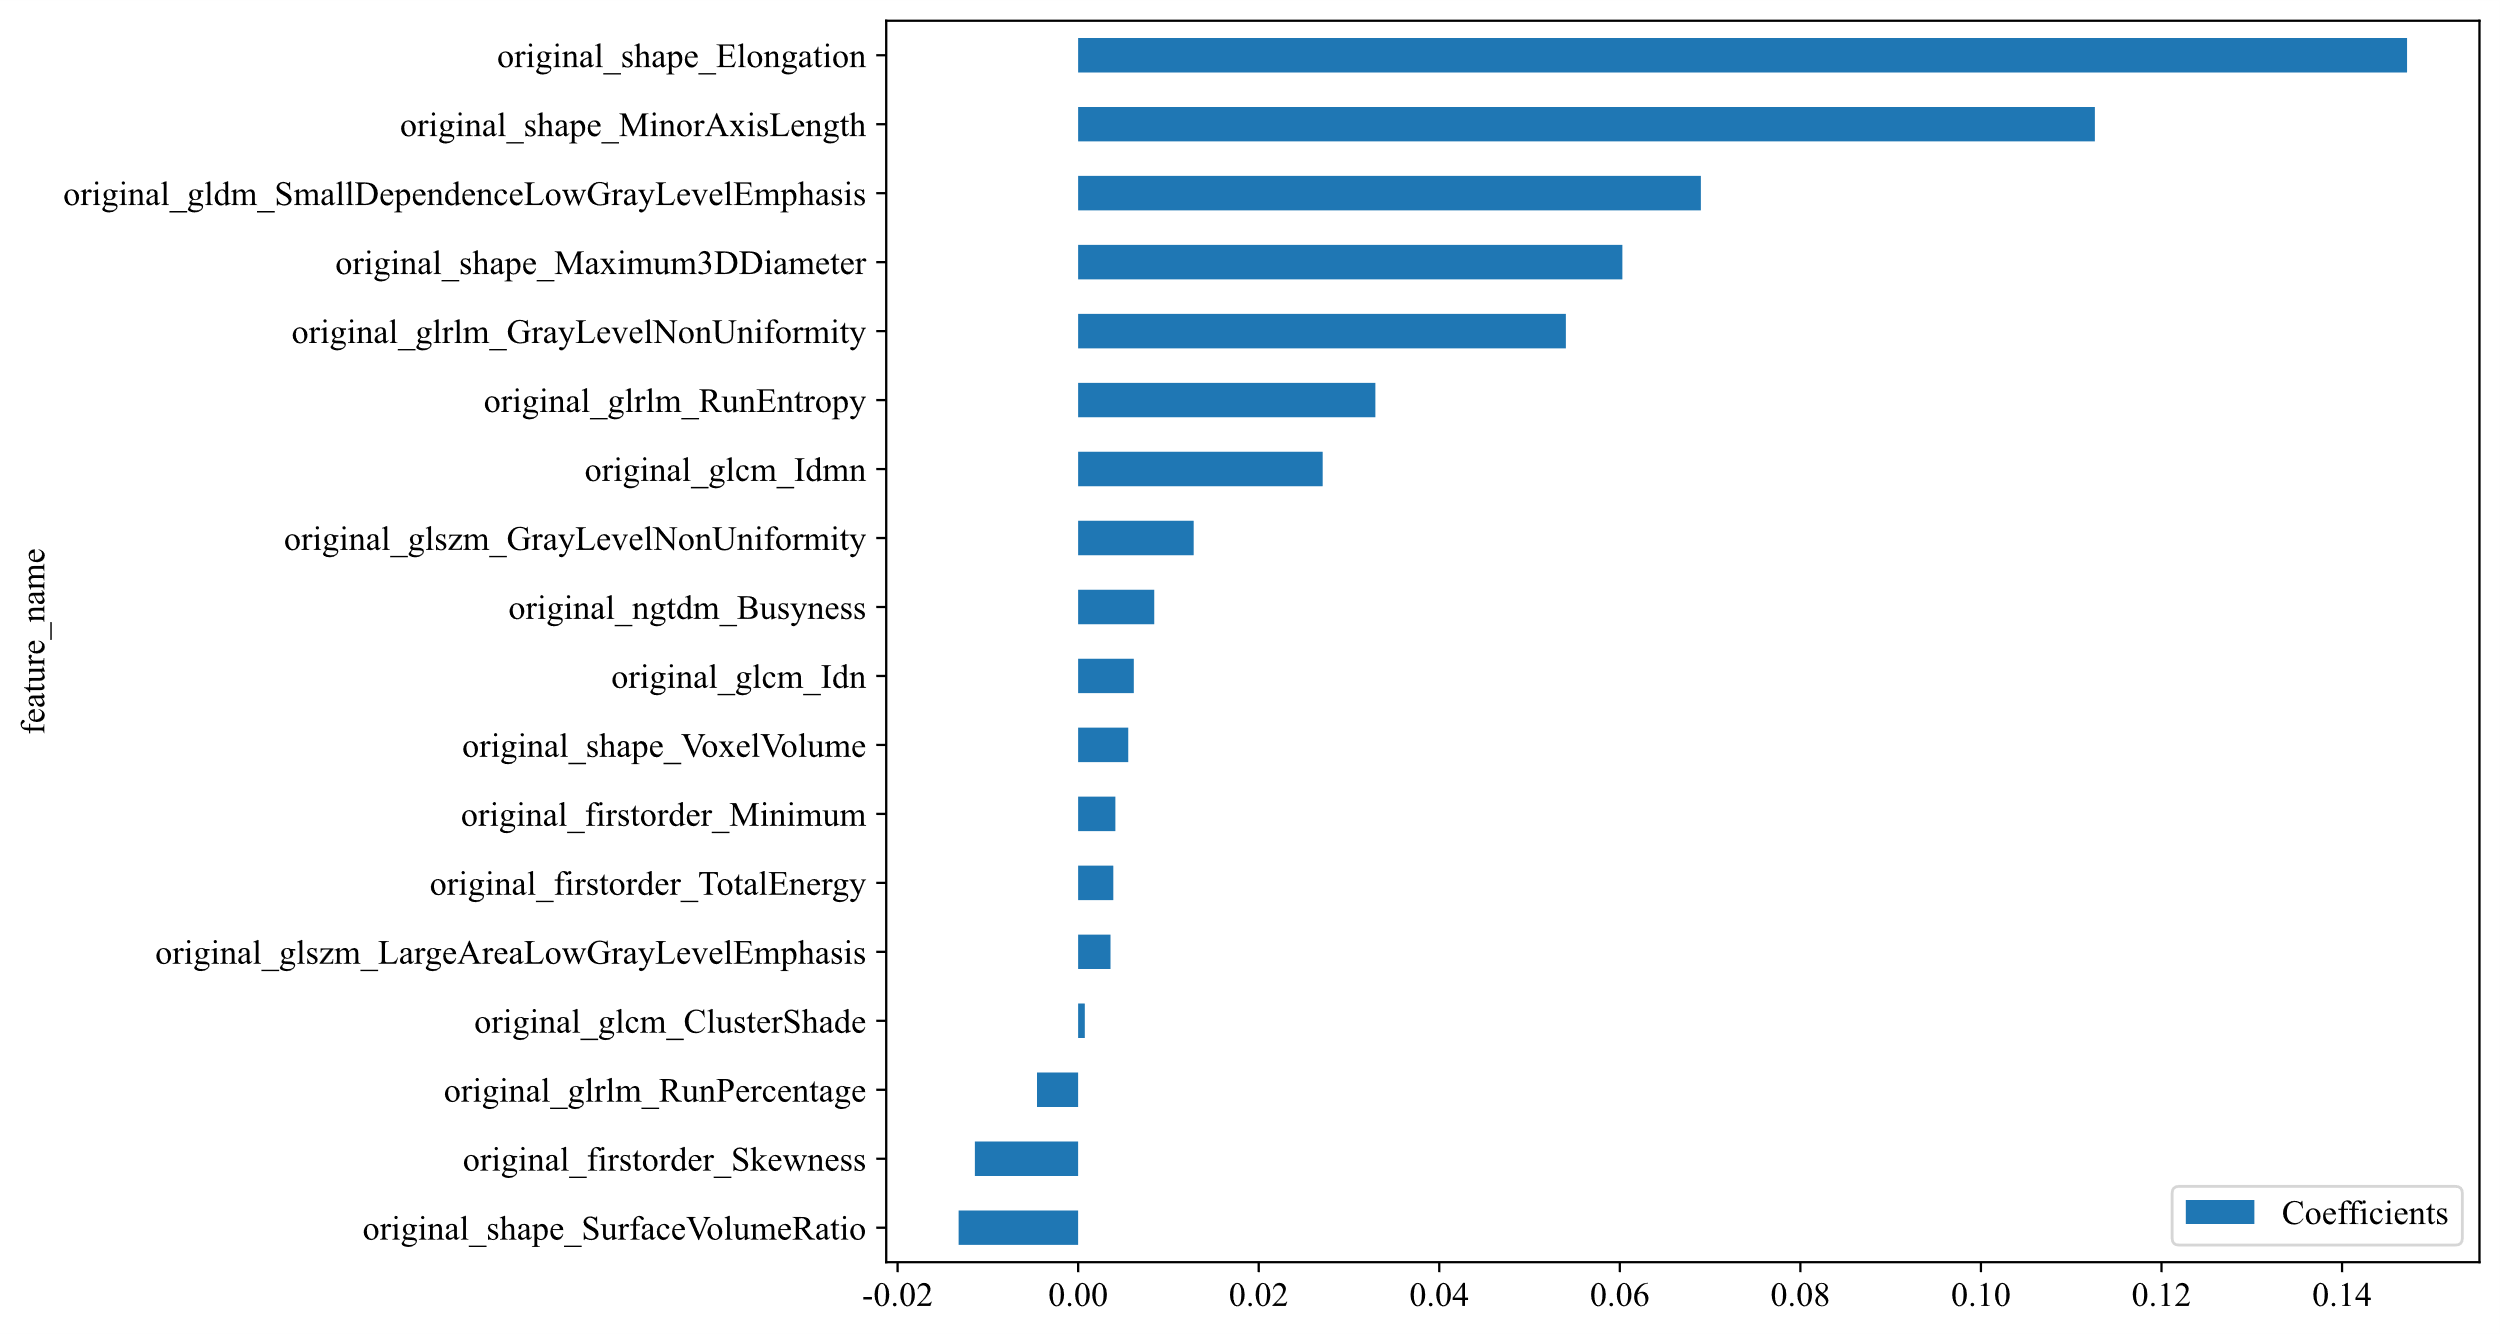


DL_SAG


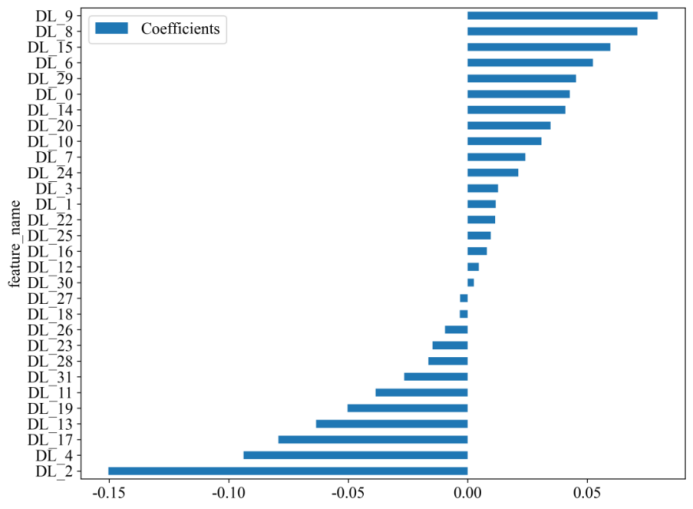


DL_AXI


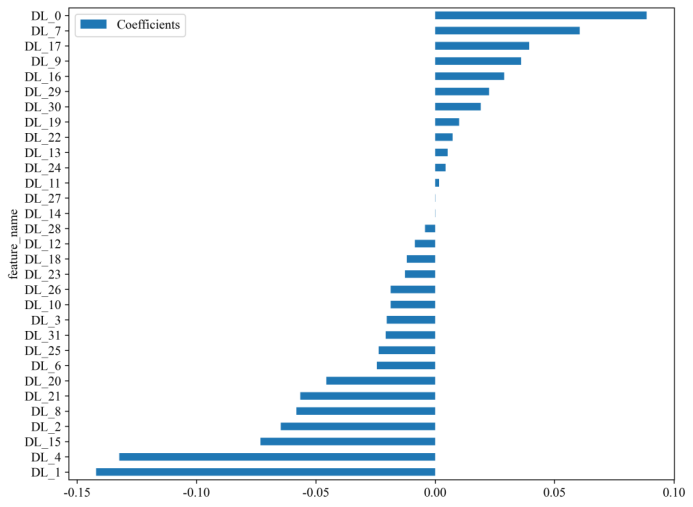


DLR


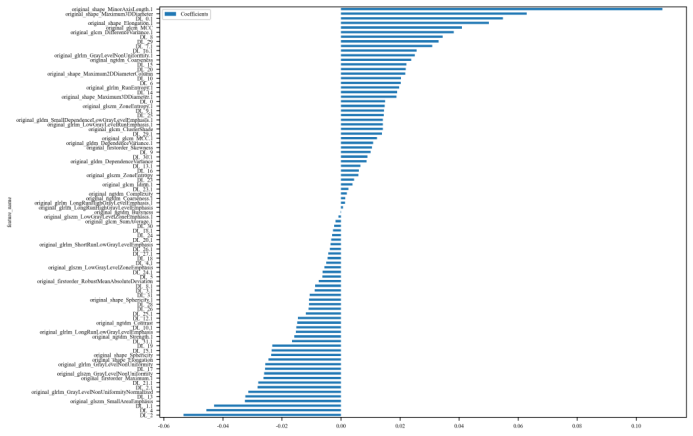


Nomogram


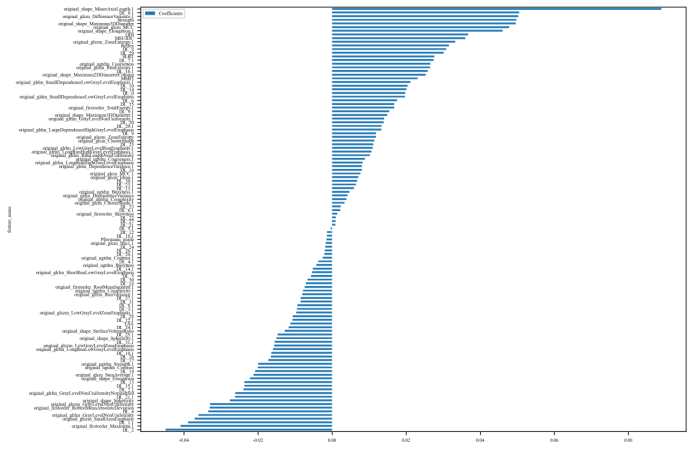


Supplementary Figure 3. ROC curves of different machine learning algorithms in each model in the test cohort. Based on the above results, SVM was the optimal algorithm.

Rad_SAG Rad_AXI


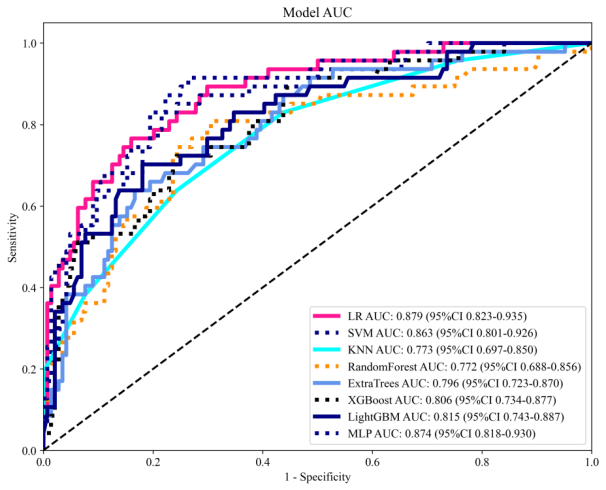

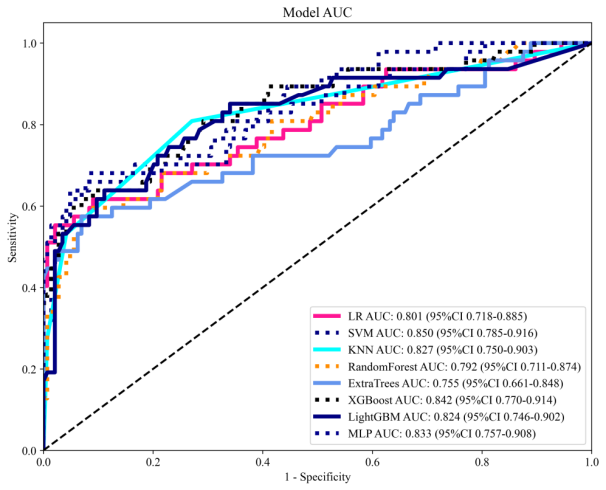


DL_SAG DL_AXI


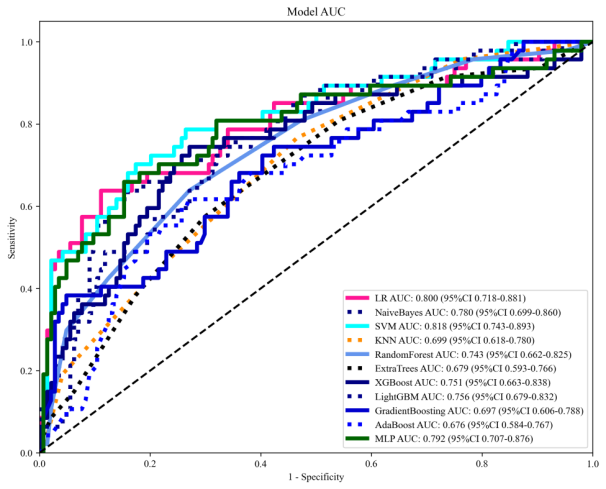

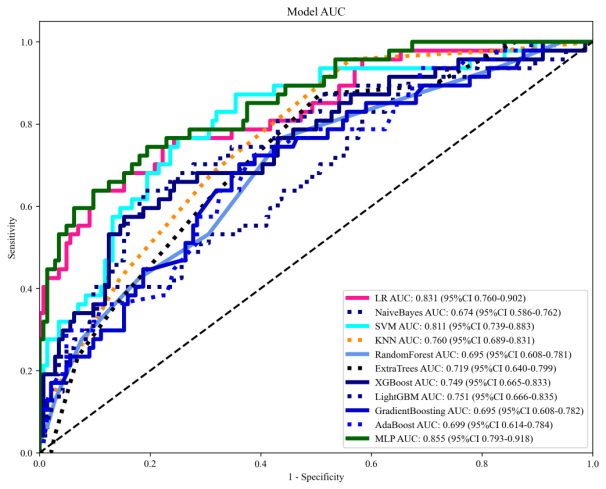


DLR Nomogram


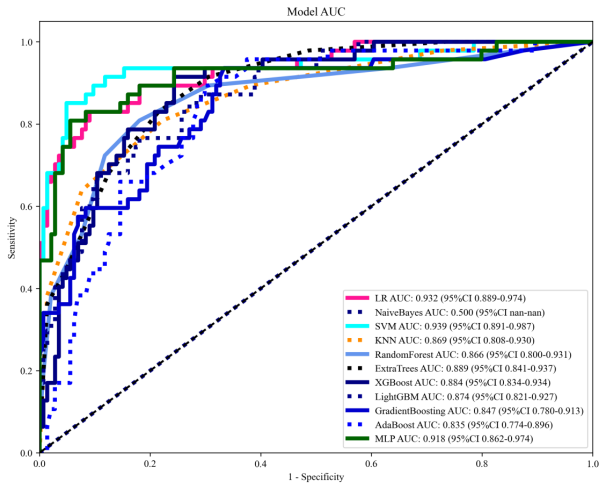

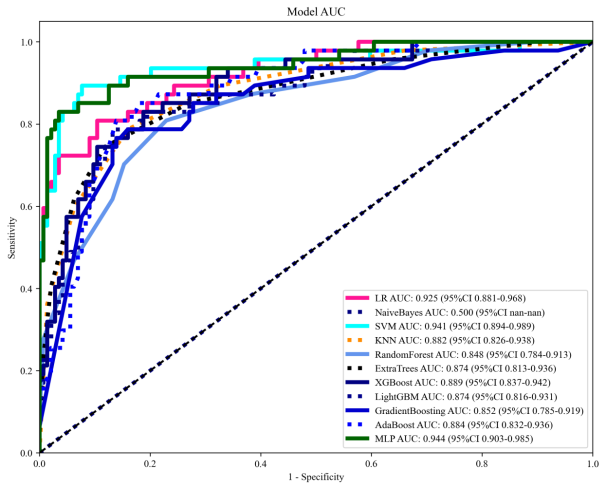


Supplementary Table 1. Performance of Rad_SAG features in the training and test cohort under different machine learning algorithms

| Model | Accuracy | AUC | 95% CI | Sensitivity | Specificity | PPV | NPV | Threshold | Task |
| --- | --- | --- | --- | --- | --- | --- | --- | --- | --- |
| LR | 0.822 | 0.887 | 0.8663 - 0.9077 | 0.819 | 0.823 | 0.739 | 0.882 | 0.382 | train |
| LR | 0.817 | 0.879 | 0.8233 - 0.9347 | 0.745 | 0.84 | 0.603 | 0.91 | 0.561 | test |
| SVM | 0.856 | 0.914 | 0.8956 - 0.9324 | 0.859 | 0.853 | 0.782 | 0.908 | 0.357 | train |
| SVM | 0.791 | 0.863 | 0.8006 - 0.9255 | 0.809 | 0.785 | 0.551 | 0.926 | 0.444 | test |
| KNN | 0.815 | 0.898 | 0.8802 - 0.9151 | 0.73 | 0.867 | 0.77 | 0.84 | 0.4 | train |
| KNN | 0.791 | 0.773 | 0.6965 - 0.8497 | 0.383 | 0.924 | 0.621 | 0.821 | 0.6 | test |
| Random Forest | 0.777 | 0.837 | 0.8123 - 0.8625 | 0.762 | 0.785 | 0.684 | 0.844 | 0.381 | train |
| Random Forest | 0.717 | 0.772 | 0.6882 - 0.8556 | 0.787 | 0.694 | 0.457 | 0.909 | 0.394 | test |
| Extra Trees | 0.745 | 0.791 | 0.7637 - 0.8192 | 0.616 | 0.823 | 0.68 | 0.779 | 0.398 | train |
| Extra Trees | 0.78 | 0.796 | 0.7226 - 0.8697 | 0.617 | 0.833 | 0.547 | 0.87 | 0.412 | test |
| XGBoost | 0.854 | 0.917 | 0.9004 - 0.9338 | 0.817 | 0.876 | 0.801 | 0.887 | 0.419 | train |
| XGBoost | 0.743 | 0.806 | 0.7344 - 0.8772 | 0.702 | 0.757 | 0.485 | 0.886 | 0.442 | test |
| LightGBM | 0.811 | 0.88 | 0.8593 - 0.9010 | 0.775 | 0.834 | 0.74 | 0.858 | 0.392 | train |
| LightGBM | 0.785 | 0.815 | 0.7433 - 0.8868 | 0.681 | 0.819 | 0.552 | 0.887 | 0.457 | test |
| MLP | 0.865 | 0.93 | 0.9145 - 0.9451 | 0.859 | 0.869 | 0.8 | 0.91 | 0.411 | train |
| MLP | 0.775 | 0.874 | 0.8179 - 0.9297 | 0.894 | 0.736 | 0.525 | 0.955 | 0.403 | test |

Supplementary Table 2. Performance of Rad_AXI features in the training and test cohort under different machine learning algorithms

| Model | Accuracy | AUC | 95% CI | Sensitivity | Specificity | PPV | NPV | Threshold | Task |
| --- | --- | --- | --- | --- | --- | --- | --- | --- | --- |
| LR | 0.847 | 0.911 | 0.8936 - 0.9288 | 0.819 | 0.864 | 0.786 | 0.887 | 0.425 | train |
| LR | 0.869 | 0.801 | 0.7177 - 0.8846 | 0.532 | 0.979 | 0.893 | 0.865 | 0.765 | test |
| SVM | 0.878 | 0.927 | 0.9100 - 0.9446 | 0.874 | 0.881 | 0.817 | 0.92 | 0.367 | train |
| SVM | 0.848 | 0.85 | 0.7853 - 0.9156 | 0.638 | 0.917 | 0.714 | 0.886 | 0.646 | test |
| KNN | 0.87 | 0.943 | 0.9311 - 0.9552 | 0.79 | 0.918 | 0.855 | 0.877 | 0.4 | train |
| KNN | 0.812 | 0.827 | 0.7505 - 0.9031 | 0.638 | 0.868 | 0.612 | 0.88 | 0.4 | test |
| Random Forest | 0.848 | 0.916 | 0.8989 - 0.9331 | 0.834 | 0.856 | 0.78 | 0.894 | 0.392 | train |
| Random Forest | 0.827 | 0.792 | 0.7111 - 0.8737 | 0.574 | 0.91 | 0.675 | 0.868 | 0.62 | test |
| Extra Trees | 0.82 | 0.877 | 0.8557 - 0.8983 | 0.745 | 0.866 | 0.772 | 0.848 | 0.415 | train |
| Extra Trees | 0.838 | 0.755 | 0.6610 - 0.8485 | 0.553 | 0.931 | 0.722 | 0.865 | 0.453 | test |
| XGBoost | 0.873 | 0.947 | 0.9339 - 0.9592 | 0.891 | 0.863 | 0.798 | 0.928 | 0.407 | train |
| XGBoost | 0.838 | 0.842 | 0.7704 - 0.9135 | 0.617 | 0.91 | 0.69 | 0.879 | 0.71 | test |
| LightGBM | 0.858 | 0.932 | 0.9167 - 0.9465 | 0.876 | 0.847 | 0.778 | 0.918 | 0.355 | train |
| LightGBM | 0.822 | 0.824 | 0.7457 - 0.9022 | 0.617 | 0.889 | 0.644 | 0.877 | 0.591 | test |
| MLP | 0.87 | 0.927 | 0.9110 - 0.9429 | 0.844 | 0.885 | 0.818 | 0.903 | 0.44 | train |
| MLP | 0.853 | 0.833 | 0.7572 - 0.9080 | 0.66 | 0.917 | 0.721 | 0.892 | 0.602 | test |

Supplementary Table 3. Performance of DL_SAG features in the training and test cohort under different machine learning algorithms

| Model | Accuracy | AUC | 95% CI | Sensitivity | Specificity | PPV | NPV | Threshold | Task |
| --- | --- | --- | --- | --- | --- | --- | --- | --- | --- |
| LR | 0.781 | 0.85 | 0.8265 - 0.8737 | 0.691 | 0.837 | 0.721 | 0.816 | 0.451 | train |
| LR | 0.822 | 0.8 | 0.7183 - 0.8813 | 0.617 | 0.889 | 0.644 | 0.877 | 0.538 | test |
| Naive Bayes | 0.781 | 0.841 | 0.8172 - 0.8652 | 0.693 | 0.835 | 0.72 | 0.817 | 0.419 | train |
| Naive Bayes | 0.785 | 0.78 | 0.6993 - 0.8598 | 0.617 | 0.84 | 0.558 | 0.871 | 0.533 | test |
| SVM | 0.888 | 0.959 | 0.9469 - 0.9710 | 0.884 | 0.891 | 0.832 | 0.926 | 0.355 | train |
| SVM | 0.791 | 0.818 | 0.7431 - 0.8928 | 0.681 | 0.826 | 0.561 | 0.888 | 0.475 | test |
| KNN | 0.815 | 0.892 | 0.8736 - 0.9098 | 0.663 | 0.908 | 0.815 | 0.815 | 0.4 | train |
| KNN | 0.702 | 0.699 | 0.6180 - 0.7799 | 0.447 | 0.785 | 0.404 | 0.813 | 0.4 | test |
| Random Forest | 0.988 | 0.999 | 0.9979 - 1.0000 | 0.968 | 1 | 1 | 0.981 | 0.5 | train |
| Random Forest | 0.634 | 0.743 | 0.6737 - 0.8245 | 0.702 | 0.611 | 0.371 | 0.863 | 0.3 | test |
| Extra Trees | 0.621 | 1 | 1.0000 - 1.0000 | 0 | 1 | 0 | 0.621 | 1 | train |
| Extra Trees | 0.717 | 0.679 | 0.5925 - 0.7662 | 0.383 | 0.826 | 0.419 | 0.804 | 0.5 | test |
| XGBoost | 0.988 | 0.999 | 0.9985 - 1.0000 | 0.985 | 0.989 | 0.983 | 0.991 | 0.44 | train |
| XGBoost | 0.728 | 0.751 | 0.6634 - 0.8378 | 0.723 | 0.729 | 0.466 | 0.89 | 0.438 | test |
| LightGBM | 0.935 | 0.98 | 0.9736 - 0.9868 | 0.906 | 0.953 | 0.922 | 0.943 | 0.426 | train |
| LightGBM | 0.686 | 0.756 | 0.6788 - 0.8324 | 0.723 | 0.674 | 0.42 | 0.882 | 0.373 | test |
| Gradient Boosting | 0.781 | 0.86 | 0.8384 - 0.8821 | 0.79 | 0.776 | 0.683 | 0.858 | 0.376 | train |
| Gradient Boosting | 0.806 | 0.697 | 0.6062 - 0.7875 | 0.362 | 0.951 | 0.708 | 0.82 | 0.535 | test |
| AdaBoost | 0.727 | 0.816 | 0.7909 - 0.8415 | 0.804 | 0.68 | 0.605 | 0.851 | 0.482 | train |
| AdaBoost | 0.702 | 0.676 | 0.5842 - 0.7674 | 0.596 | 0.736 | 0.424 | 0.848 | 0.494 | test |
| MLP | 0.891 | 0.952 | 0.9399 - 0.9640 | 0.834 | 0.926 | 0.873 | 0.901 | 0.477 | train |
| MLP | 0.78 | 0.792 | 0.7089 - 0.8765 | 0.66 | 0.819 | 0.544 | 0.881 | 0.528 | test |

Supplementary Table 4. Performance of DL_AXI features in the training and test cohort under different machine learning algorithms

| Model | Accuracy | AUC | 95% CI | Sensitivity | Specificity | PPV | NPV | Threshold | Task |
| --- | --- | --- | --- | --- | --- | --- | --- | --- | --- |
| LR | 0.792 | 0.874 | 0.8530 - 0.8945 | 0.827 | 0.77 | 0.687 | 0.879 | 0.363 | train |
| LR | 0.832 | 0.831 | 0.7601 - 0.9019 | 0.617 | 0.903 | 0.674 | 0.878 | 0.624 | test |
| NaiveBayes | 0.723 | 0.796 | 0.7691 - 0.8226 | 0.748 | 0.708 | 0.61 | 0.821 | 0.47 | train |
| NaiveBayes | 0.759 | 0.674 | 0.5862 - 0.7625 | 0.383 | 0.882 | 0.514 | 0.814 | 0.815 | test |
| SVM | 0.909 | 0.96 | 0.9478 - 0.9720 | 0.918 | 0.903 | 0.853 | 0.948 | 0.378 | train |
| SVM | 0.696 | 0.811 | 0.7393 - 0.8828 | 0.851 | 0.646 | 0.44 | 0.93 | 0.272 | test |
| KNN | 0.806 | 0.912 | 0.8955 - 0.9278 | 0.525 | 0.977 | 0.934 | 0.771 | 0.6 | train |
| KNN | 0.686 | 0.76 | 0.6887 - 0.8314 | 0.681 | 0.687 | 0.416 | 0.868 | 0.4 | test |
| Random Forest | 0.985 | 0.999 | 0.9986 - 0.9998 | 0.965 | 0.997 | 0.995 | 0.979 | 0.5 | train |
| Random Forest | 0.607 | 0.707 | 0.6263 - 0.7880 | 0.681 | 0.583 | 0.348 | 0.848 | 0.3 | test |
| Extra Trees | 0.621 | 1 | 1.0000 - 1.0000 | 0 | 1 | 0 | 0.621 | 1 | train |
| Extra Trees | 0.675 | 0.719 | 0.6403 - 0.7986 | 0.617 | 0.694 | 0.397 | 0.847 | 0.4 | test |
| XGBoost | 0.984 | 0.998 | 0.9961 - 0.9994 | 0.985 | 0.983 | 0.973 | 0.991 | 0.492 | train |
| XGBoost | 0.775 | 0.749 | 0.6650 - 0.8332 | 0.553 | 0.847 | 0.542 | 0.853 | 0.591 | test |
| LightGBM | 0.929 | 0.979 | 0.9719 - 0.9851 | 0.886 | 0.955 | 0.923 | 0.932 | 0.444 | train |
| LightGBM | 0.764 | 0.751 | 0.6665 - 0.8347 | 0.617 | 0.812 | 0.518 | 0.867 | 0.477 | test |
| Gradient Boosting | 0.792 | 0.878 | 0.8579 - 0.8990 | 0.787 | 0.795 | 0.7 | 0.859 | 0.417 | train |
| Gradient Boosting | 0.649 | 0.695 | 0.6082 - 0.7822 | 0.681 | 0.639 | 0.381 | 0.86 | 0.415 | test |
| AdaBoost | 0.766 | 0.844 | 0.8211 - 0.8677 | 0.75 | 0.776 | 0.672 | 0.836 | 0.491 | train |
| AdaBoost | 0.639 | 0.699 | 0.6141 - 0.7843 | 0.702 | 0.618 | 0.375 | 0.864 | 0.485 | test |
| MLP | 0.879 | 0.948 | 0.9361 - 0.9608 | 0.901 | 0.866 | 0.804 | 0.935 | 0.421 | train |
| MLP | 0.838 | 0.856 | 0.7941 - 0.9181 | 0.617 | 0.91 | 0.69 | 0.879 | 0.685 | test |

Supplementary Table 5. Performance of DLR features in the training and test cohort under different machine learning algorithms

| Model | Accuracy | AUC | 95% CI | Sensitivity | Specificity | PPV | NPV | Threshold | Task |
| --- | --- | --- | --- | --- | --- | --- | --- | --- | --- |
| LR | 0.931 | 0.975 | 0.9660 - 0.9835 | 0.906 | 0.946 | 0.91 | 0.943 | 0.479 | train |
| LR | 0.885 | 0.932 | 0.8887 - 0.9744 | 0.809 | 0.91 | 0.745 | 0.936 | 0.572 | test |
| NaiveBayes | 0.853 | 0.919 | 0.9018 - 0.9353 | 0.901 | 0.823 | 0.757 | 0.932 | 1 | train |
| NaiveBayes | 0.754 | 0.5 | 1.0000 - 1.0000 | 0 | 1 | 0 | 0.754 | 0 | test |
| SVM | 0.967 | 0.991 | 0.9851 - 0.9968 | 0.975 | 0.962 | 0.94 | 0.985 | 0.366 | train |
| SVM | 0.921 | 0.939 | 0.8914 - 0.9874 | 0.83 | 0.951 | 0.848 | 0.945 | 0.624 | test |
| KNN | 0.867 | 0.962 | 0.9523 - 0.9711 | 0.683 | 0.979 | 0.952 | 0.835 | 0.6 | train |
| KNN | 0.853 | 0.869 | 0.8080 - 0.9300 | 0.638 | 0.924 | 0.732 | 0.887 | 0.6 | test |
| Random Forest | 0.992 | 1 | 0.9987 - 1.0000 | 0.983 | 0.998 | 0.997 | 0.99 | 0.5 | train |
| Random Forest | 0.843 | 0.866 | 0.8002 - 0.9314 | 0.723 | 0.882 | 0.667 | 0.907 | 0.5 | test |
| ExtraTrees | 0.621 | 1 | 1.0000 - 1.0000 | 0 | 1 | 0 | 0.621 | 1 | train |
| ExtraTrees | 0.827 | 0.889 | 0.8410 - 0.9369 | 0.681 | 0.875 | 0.64 | 0.894 | 0.5 | test |
| XGBoost | 0.997 | 1 | 1.0000 - 1.0000 | 0.998 | 0.997 | 0.995 | 0.998 | 0.431 | train |
| XGBoost | 0.791 | 0.884 | 0.8336 - 0.9342 | 0.894 | 0.757 | 0.545 | 0.956 | 0.363 | test |
| LightGBM | 0.95 | 0.992 | 0.9890 - 0.9953 | 0.923 | 0.967 | 0.944 | 0.954 | 0.486 | train |
| LightGBM | 0.801 | 0.874 | 0.8206 - 0.9271 | 0.745 | 0.819 | 0.574 | 0.908 | 0.478 | test |
| Gradient Boosting | 0.895 | 0.961 | 0.9501 - 0.9712 | 0.908 | 0.887 | 0.83 | 0.941 | 0.39 | train |
| Gradient Boosting | 0.733 | 0.847 | 0.7804 - 0.9130 | 0.915 | 0.674 | 0.478 | 0.96 | 0.226 | test |
| AdaBoost | 0.86 | 0.943 | 0.9299 - 0.9555 | 0.911 | 0.829 | 0.765 | 0.938 | 0.468 | train |
| AdaBoost | 0.743 | 0.835 | 0.7741 - 0.8963 | 0.872 | 0.701 | 0.488 | 0.944 | 0.472 | test |
| MLP | 0.987 | 0.997 | 0.9944 - 0.9997 | 0.99 | 0.985 | 0.976 | 0.994 | 0.411 | train |
| MLP | 0.906 | 0.918 | 0.8616 - 0.9738 | 0.787 | 0.944 | 0.822 | 0.932 | 0.814 | test |

Supplementary Table 6. Performance of clinical features in the training and test cohort under different machine learning algorithms

| Model | Accuracy | AUC | 95% CI | Sensitivity | Specificity | PPV | NPV | Precision | Task |
| --- | --- | --- | --- | --- | --- | --- | --- | --- | --- |
| LR | 0.729 | 0.765 | 0.7349 - 0.7953 | 0.705 | 0.743 | 0.626 | 0.805 | 0.626 | train |
| LR | 0.785 | 0.755 | 0.6687 - 0.8403 | 0.532 | 0.868 | 0.568 | 0.85 | 0.568 | test |
| SVM | 0.825 | 0.906 | 0.8885 - 0.9238 | 0.822 | 0.826 | 0.743 | 0.884 | 0.743 | train |
| SVM | 0.801 | 0.904 | 0.8549 - 0.9538 | 0.809 | 0.799 | 0.567 | 0.927 | 0.567 | test |
| KNN | 0.866 | 0.955 | 0.9443 - 0.9651 | 0.698 | 0.968 | 0.931 | 0.84 | 0.931 | train |
| KNN | 0.848 | 0.854 | 0.7822 - 0.9249 | 0.638 | 0.917 | 0.714 | 0.886 | 0.714 | test |
| Random Forest | 0.918 | 0.979 | 0.9730 - 0.9856 | 0.911 | 0.923 | 0.878 | 0.944 | 0.878 | train |
| Random Forest | 0.827 | 0.855 | 0.7848 - 0.9256 | 0.745 | 0.854 | 0.625 | 0.911 | 0.625 | test |
| Extra Trees | 0.929 | 0.986 | 0.9815 - 0.9906 | 0.916 | 0.937 | 0.898 | 0.948 | 0.898 | train |
| Extra Trees | 0.832 | 0.802 | 0.7242 - 0.8798 | 0.617 | 0.903 | 0.674 | 0.878 | 0.674 | test |
| XGBoost | 0.874 | 0.95 | 0.9381 - 0.9615 | 0.854 | 0.887 | 0.821 | 0.909 | 0.821 | train |
| XGBoost | 0.806 | 0.914 | 0.8676 - 0.9613 | 0.915 | 0.771 | 0.566 | 0.965 | 0.566 | test |
| LightGBM | 0.852 | 0.935 | 0.9212 - 0.9489 | 0.834 | 0.863 | 0.787 | 0.895 | 0.787 | train |
| LightGBM | 0.859 | 0.922 | 0.8760 - 0.9685 | 0.809 | 0.875 | 0.679 | 0.933 | 0.679 | test |
| MLP | 0.799 | 0.848 | 0.8247 - 0.8710 | 0.725 | 0.844 | 0.74 | 0.834 | 0.74 | train |
| MLP | 0.796 | 0.793 | 0.7212 - 0.8641 | 0.617 | 0.854 | 0.58 | 0.872 | 0.58 | test |

Supplementary Table 7. Performance of DLRN features in the training and test cohort under different machine learning algorithms

| Model | Accuracy | AUC | 95% CI | Sensitivity | Specificity | PPV | NPV | Threshold | Task |
| --- | --- | --- | --- | --- | --- | --- | --- | --- | --- |
| LR | 0.936 | 0.981 | 0.9742 - 0.9887 | 0.938 | 0.935 | 0.898 | 0.961 | 0.394 | train |
| LR | 0.869 | 0.925 | 0.8810 - 0.9683 | 0.787 | 0.896 | 0.712 | 0.928 | 0.478 | test |
| NaiveBayes | 0.847 | 0.913 | 0.8962 - 0.9301 | 0.923 | 0.801 | 0.739 | 0.945 | 0.967 | train |
| NaiveBayes | 0.754 | 0.5 | 1.0000 - 1.0000 | 0 | 1 | 0 | 0.754 | 0 | test |
| SVM | 0.973 | 0.994 | 0.9894 - 0.9990 | 0.983 | 0.967 | 0.947 | 0.989 | 0.329 | train |
| SVM | 0.911 | 0.941 | 0.8936 - 0.9885 | 0.872 | 0.924 | 0.788 | 0.957 | 0.57 | test |
| KNN | 0.894 | 0.961 | 0.9512 - 0.9703 | 0.824 | 0.937 | 0.888 | 0.897 | 0.4 | train |
| KNN | 0.853 | 0.882 | 0.8255 - 0.9381 | 0.596 | 0.937 | 0.757 | 0.877 | 0.6 | test |
| Random Forest | 0.996 | 1 | 0.9998 - 1.0000 | 0.99 | 1 | 1 | 0.994 | 0.5 | train |
| Random Forest | 0.812 | 0.848 | 0.7843 - 0.9127 | 0.702 | 0.847 | 0.6 | 0.897 | 0.5 | test |
| Extra Trees | 0.621 | 1 | 1.0000 - 1.0000 | 0 | 1 | 0 | 0.621 | 1 | train |
| Extra Trees | 0.859 | 0.874 | 0.8128 - 0.9359 | 0.617 | 0.937 | 0.763 | 0.882 | 0.6 | test |
| XGBoost | 0.991 | 1 | 0.9995 - 1.0000 | 0.99 | 0.991 | 0.985 | 0.994 | 0.443 | train |
| XGBoost | 0.812 | 0.889 | 0.8366 - 0.9423 | 0.809 | 0.812 | 0.585 | 0.929 | 0.529 | test |
| LightGBM | 0.947 | 0.992 | 0.9883 - 0.9949 | 0.916 | 0.965 | 0.941 | 0.949 | 0.506 | train |
| LightGBM | 0.843 | 0.874 | 0.8165 - 0.9309 | 0.766 | 0.868 | 0.655 | 0.919 | 0.57 | test |
| Gradient Boosting | 0.932 | 0.967 | 0.9559 - 0.9772 | 0.95 | 0.921 | 0.881 | 0.968 | 0.302 | train |
| Gradient Boosting | 0.832 | 0.852 | 0.7850 - 0.9189 | 0.766 | 0.854 | 0.632 | 0.918 | 0.581 | test |
| AdaBoost | 0.905 | 0.962 | 0.9518 - 0.9726 | 0.918 | 0.897 | 0.845 | 0.947 | 0.484 | train |
| AdaBoost | 0.827 | 0.884 | 0.8321 - 0.9358 | 0.83 | 0.826 | 0.609 | 0.937 | 0.492 | test |
| MLP | 0.995 | 0.999 | 0.9969 - 1.0000 | 0.993 | 0.997 | 0.995 | 0.995 | 0.534 | train |
| MLP | 0.927 | 0.944 | 0.9026 - 0.9854 | 0.809 | 0.965 | 0.884 | 0.939 | 0.757 | test |
